# Supplementary material for: Bioaugmentation process of secondary effluents for reduction of pathogens, heavy metals and antibiotics
Source: Oxford University Press journal article supplement (doi:10.2166/wh.2016.046), 2016-05-27
Supplement: wh2016046supp.docx [file wh2016046supp.docx]

**Appendix A**
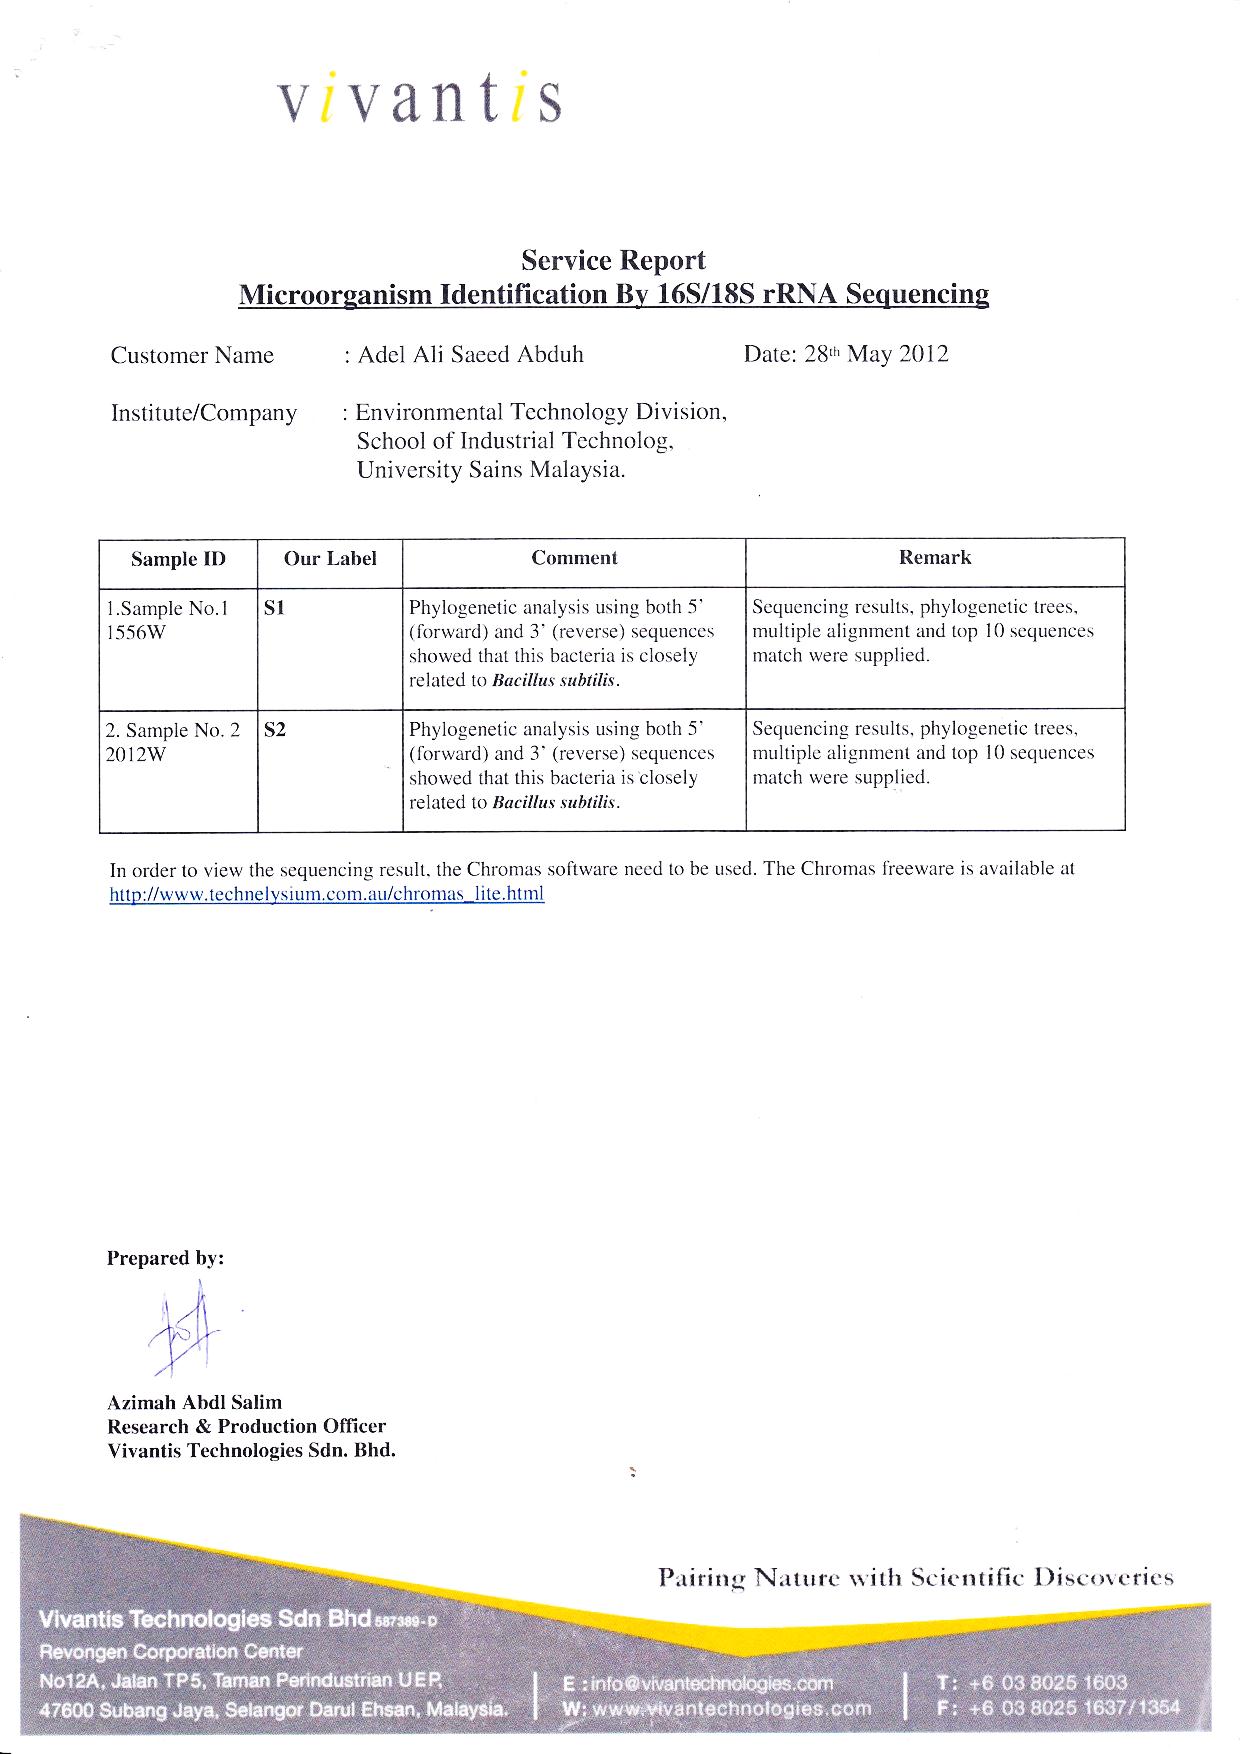


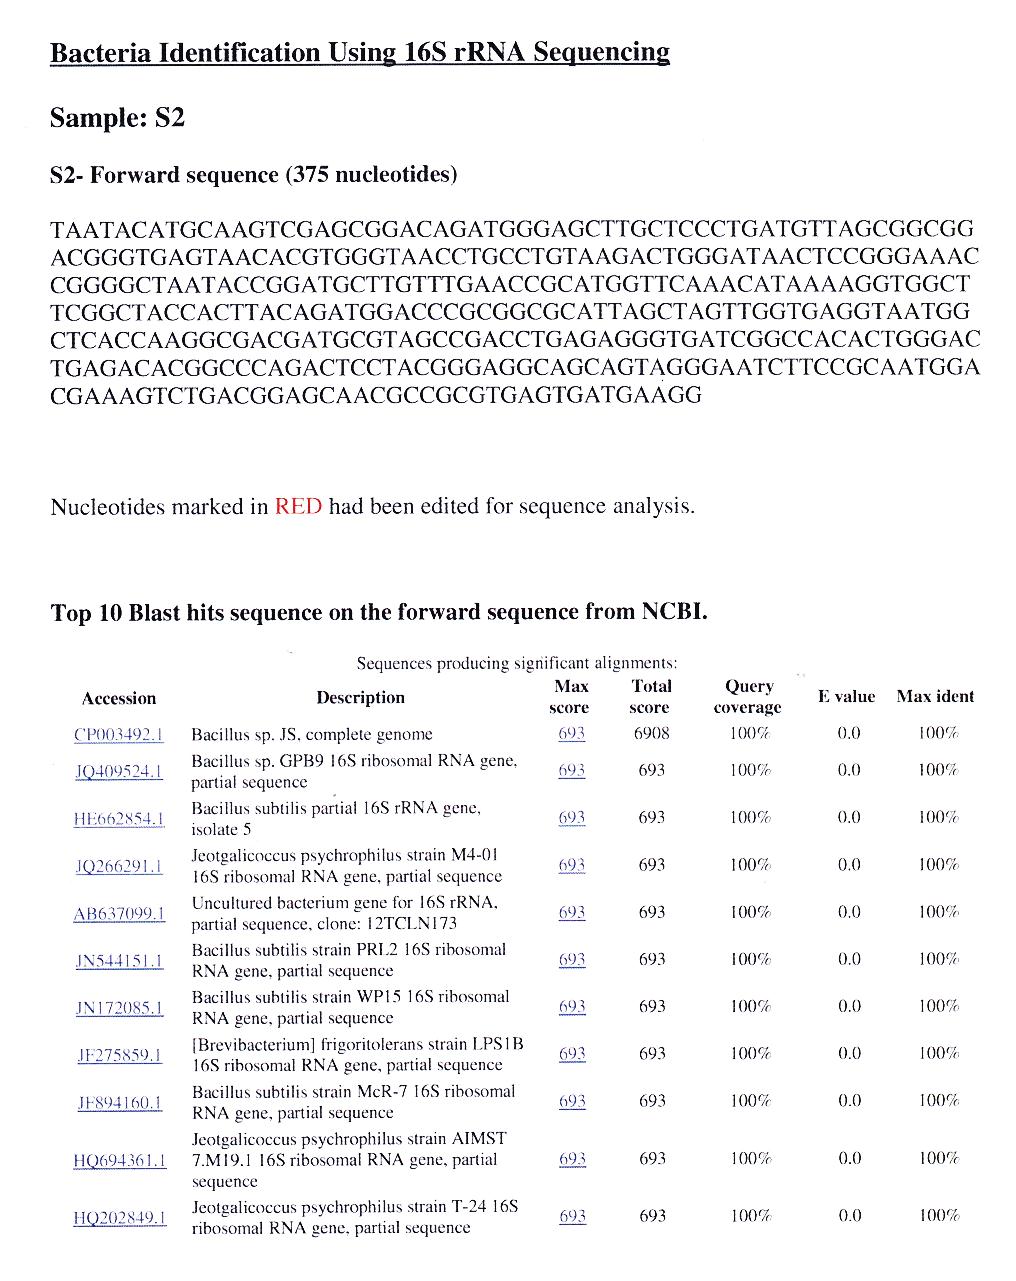


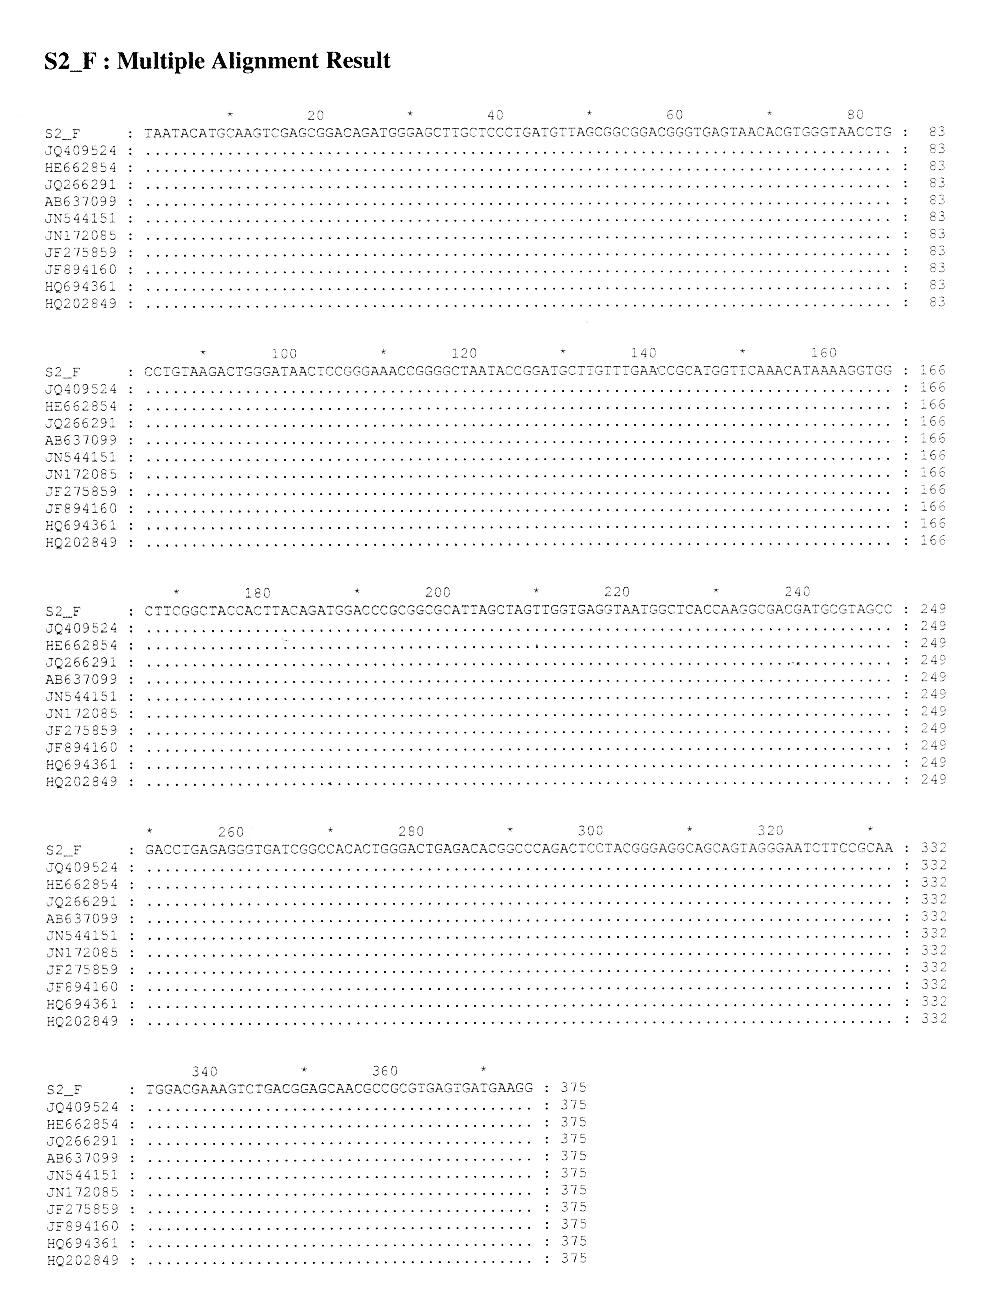


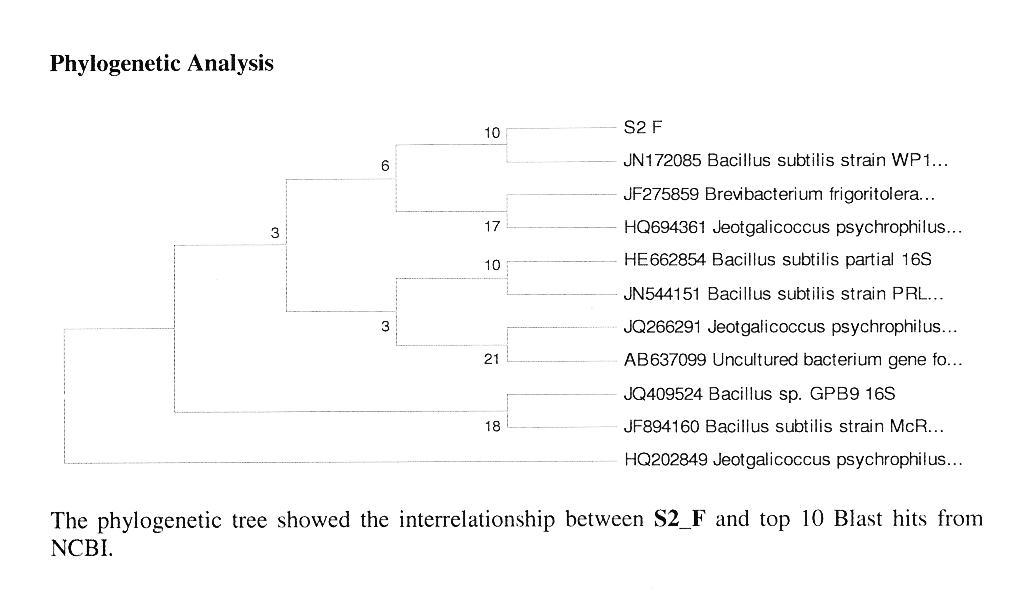


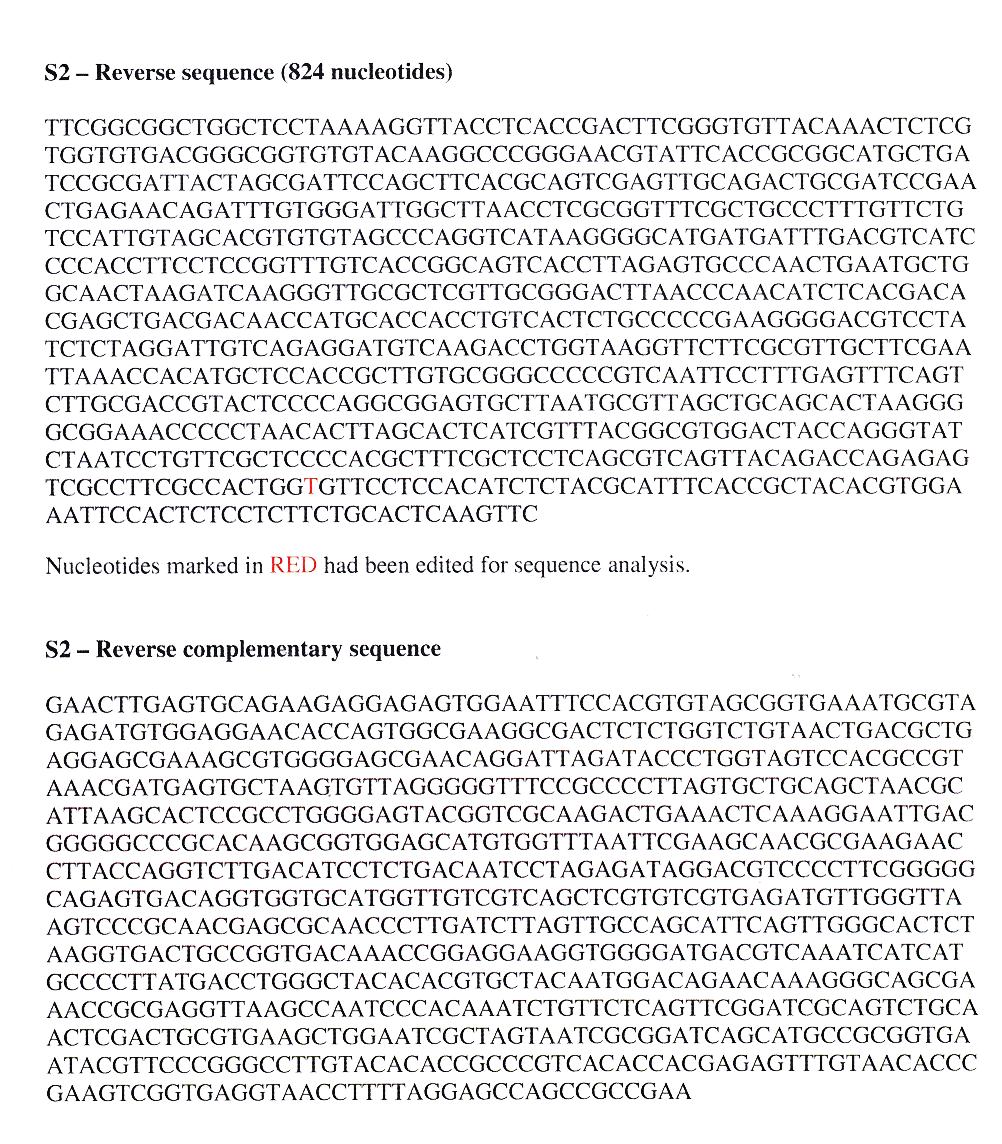


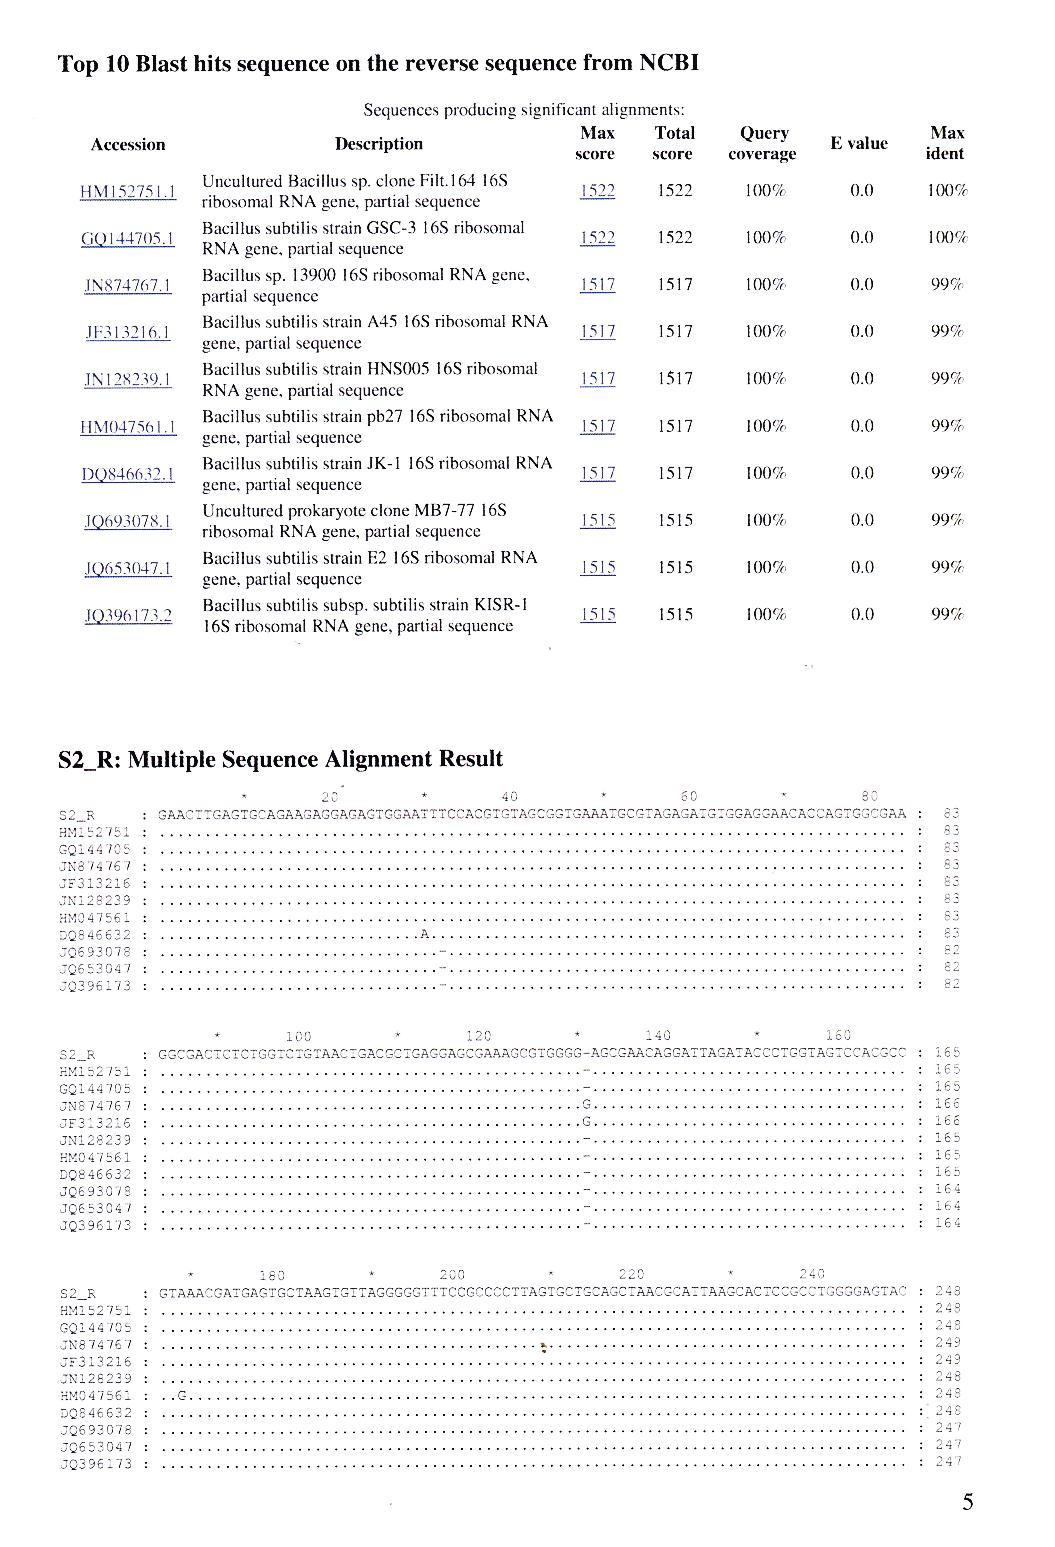


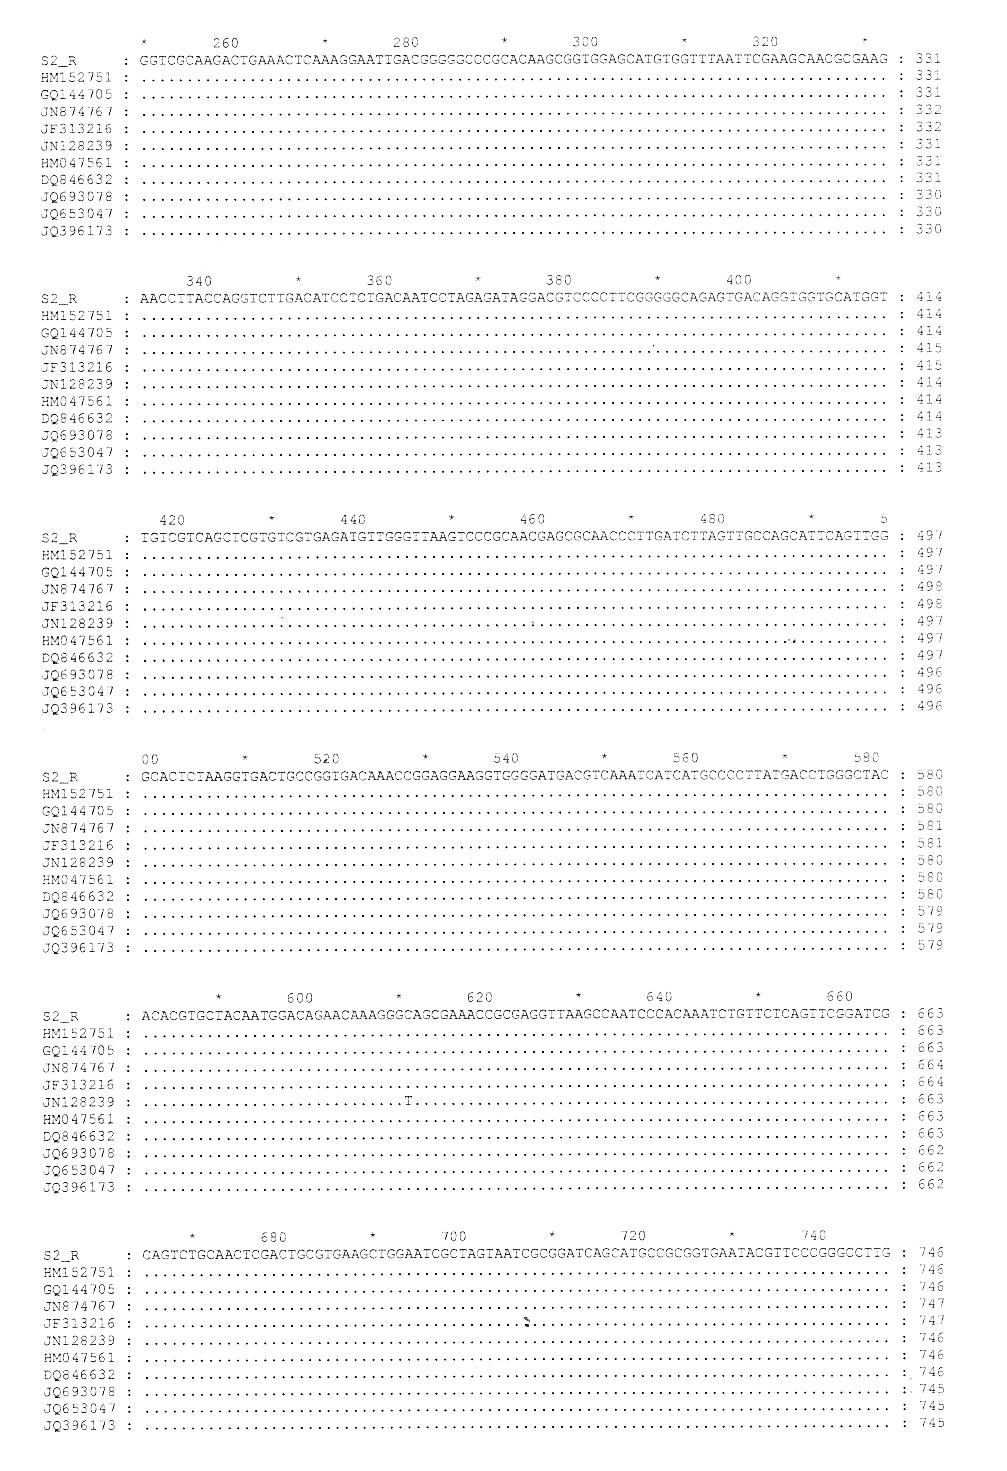


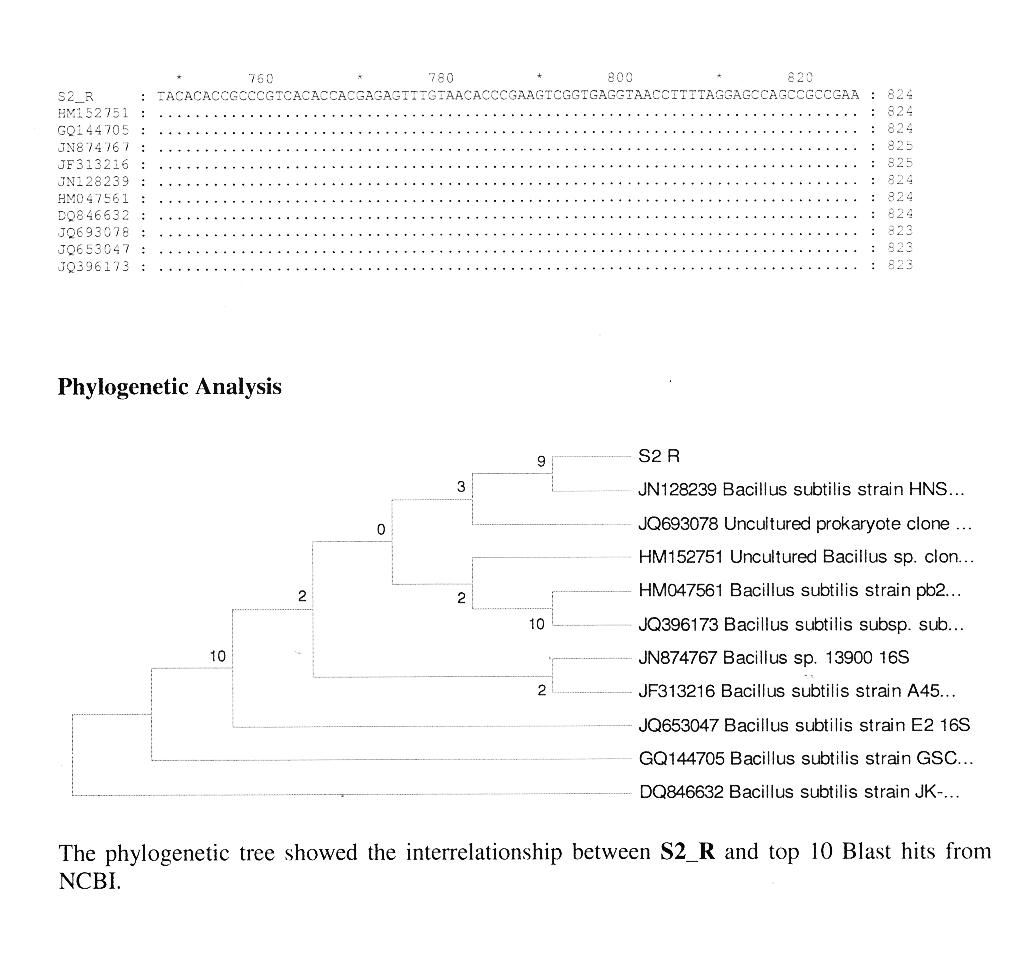


**Appendix B**

**Scanning of the cephalexin absorbance among different wavelengths**

**Figure B1** | The optimal absorbance of cephalexin among different wavelengths.

**Appendix C**

**Calibration curve of the cephalexin and cephalosporic acid**

**Figure C1** | Calibration curve of the cephalexin and cephalosporic acid in 0.1 M phosphate buffer: pH = 7.0, T = 30°C, λ = 340 nm.

One unit of β-lactamase concentration was defined as the amount of enzyme that could hydrolyse 1µmol of cephalexin at 30 °C and pH 7.0 in 1 min. The product of the hydrolysis reaction, cephalosporic acid, also gives an absorbance at 340 nm, therefore, the difference of the slopes is taken, y1-y2 = 0.2135 Aλ. The activity of enzyme, U mL-1 is given by ***1*U = A**λ **× 0.2135 ×** *Dilution factor.*
